# Supplementary material for: Single atom alloy catalyst for SO3decomposition: enhancement of platinum catalyst's performance by Ag atom embedding
Source: Royal Society of Chemistry journal article supplement (doi:10.1039/c8nr05179h), 2018-01-01
Supplement: c8nr05179h1.pdf [file c8nr05179h1.pdf]

# Single atom alloy catalyst for SO<sub>3</sub> decomposition: Enhancement of platinum catalyst's performance by Ag atom embedding

Sandeep Nigam\* and Chiranjib Majumder

## Supporting Information

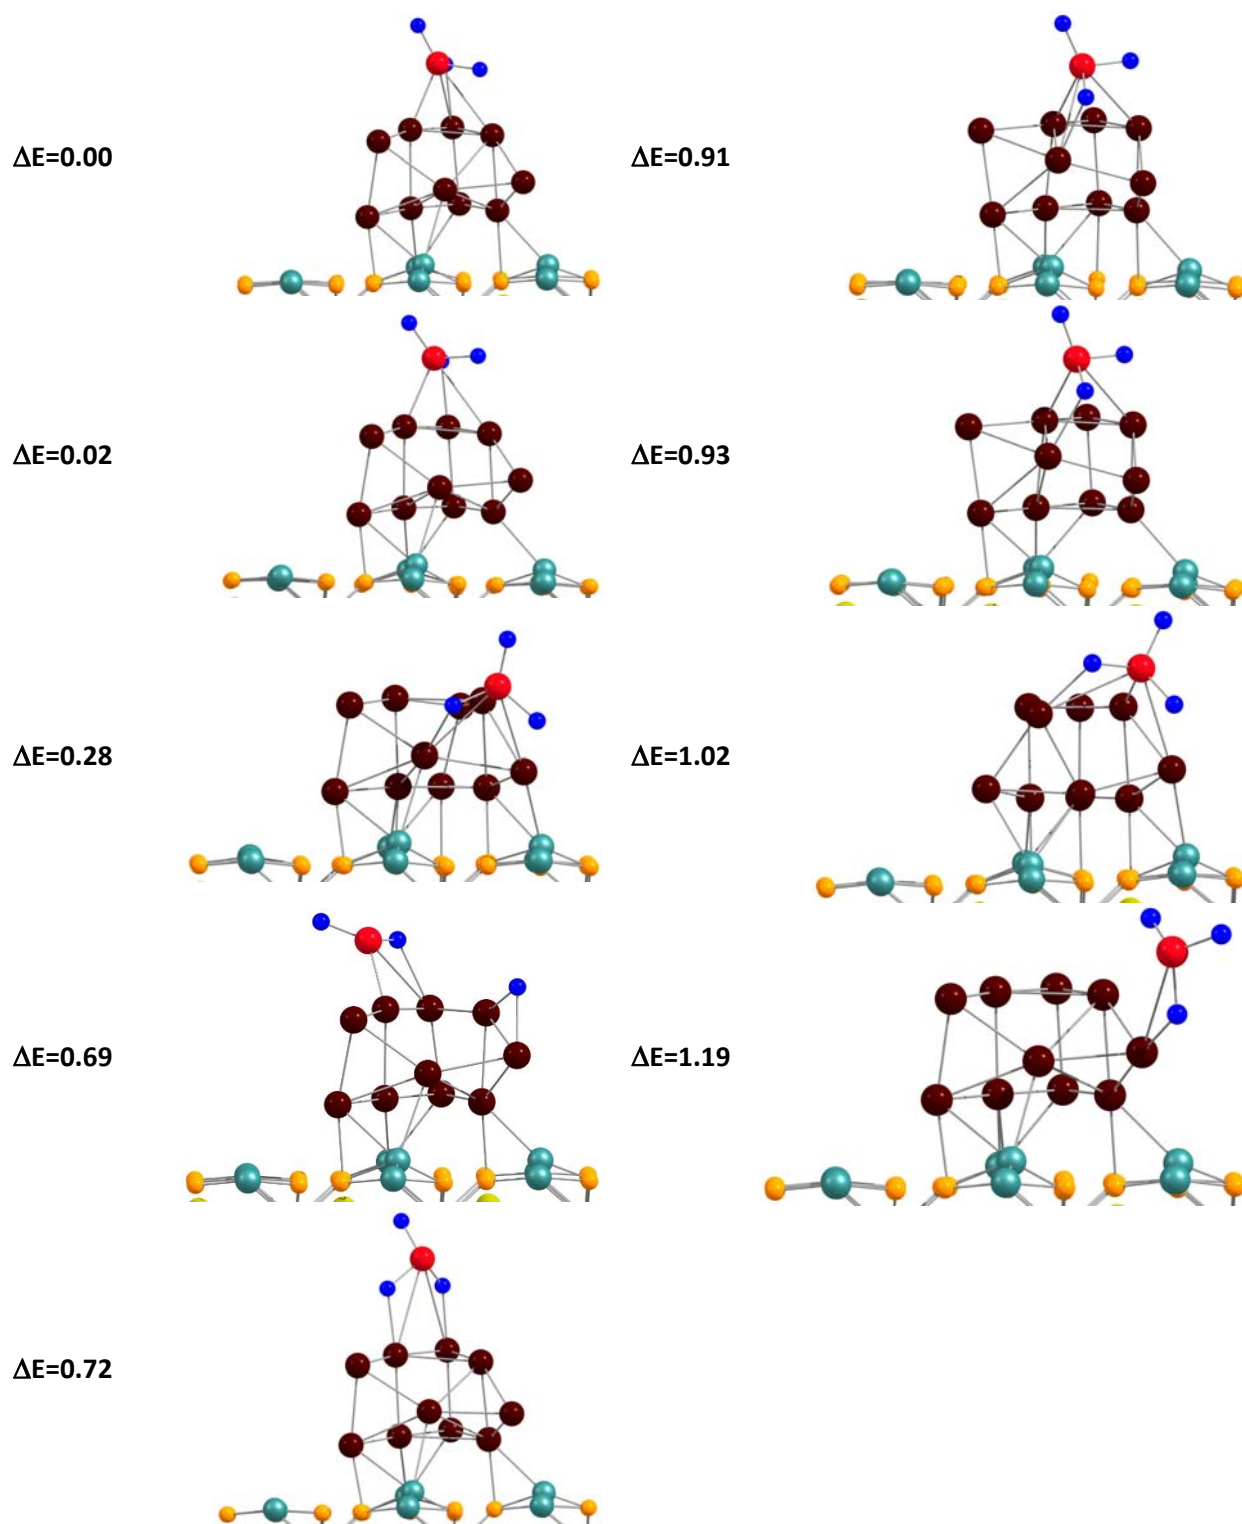

Figure-S1: Low lying isomer of SO<sub>3</sub>-(Pt<sub>10</sub>@Al<sub>2</sub>O<sub>3</sub>) complex.  $\Delta E$  indicates relative stability.

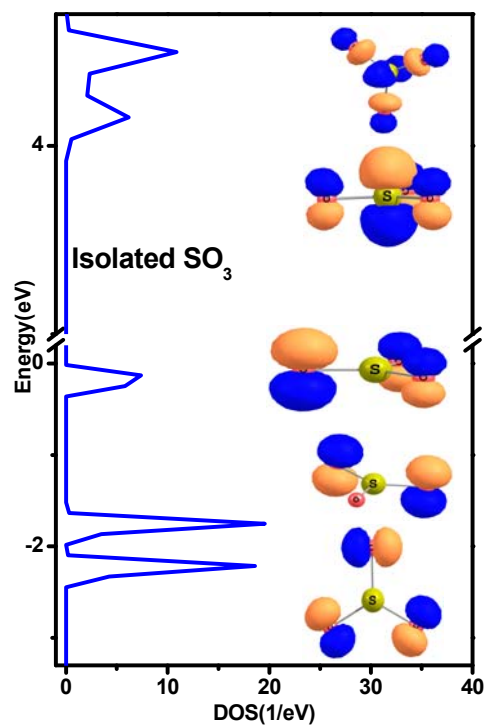

Figure-S2: Electronic density of states of pristine  $\text{SO}_3$  molecule. Molecular Orbital pictures has been obtained via all electron calculations at B3LYP/6-311+g(d, p) level of theory.

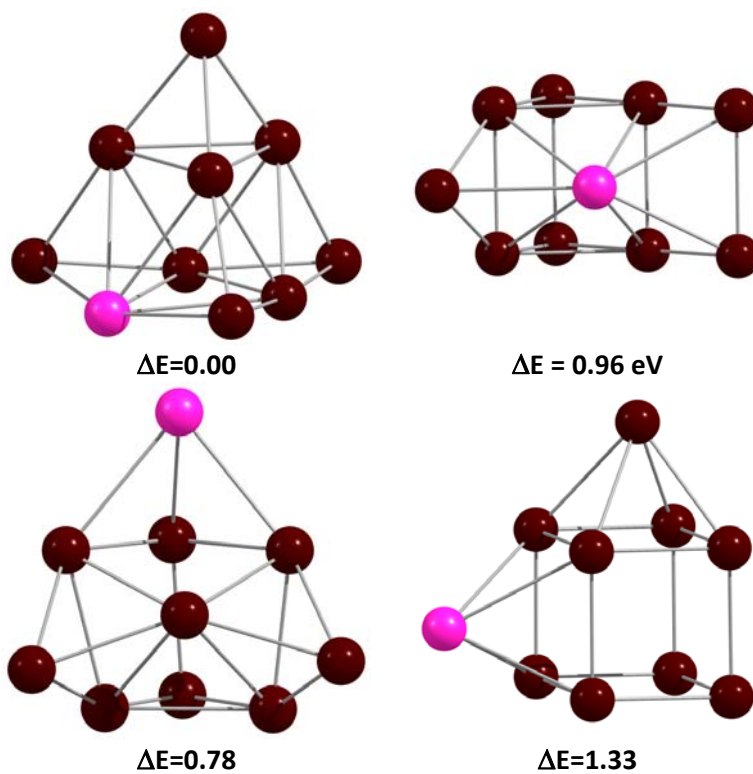

Figure-S3: Low lying isomer of gas phase  $\text{AgPt}_9$  cluster.  $\Delta E$  indicates relative stability.

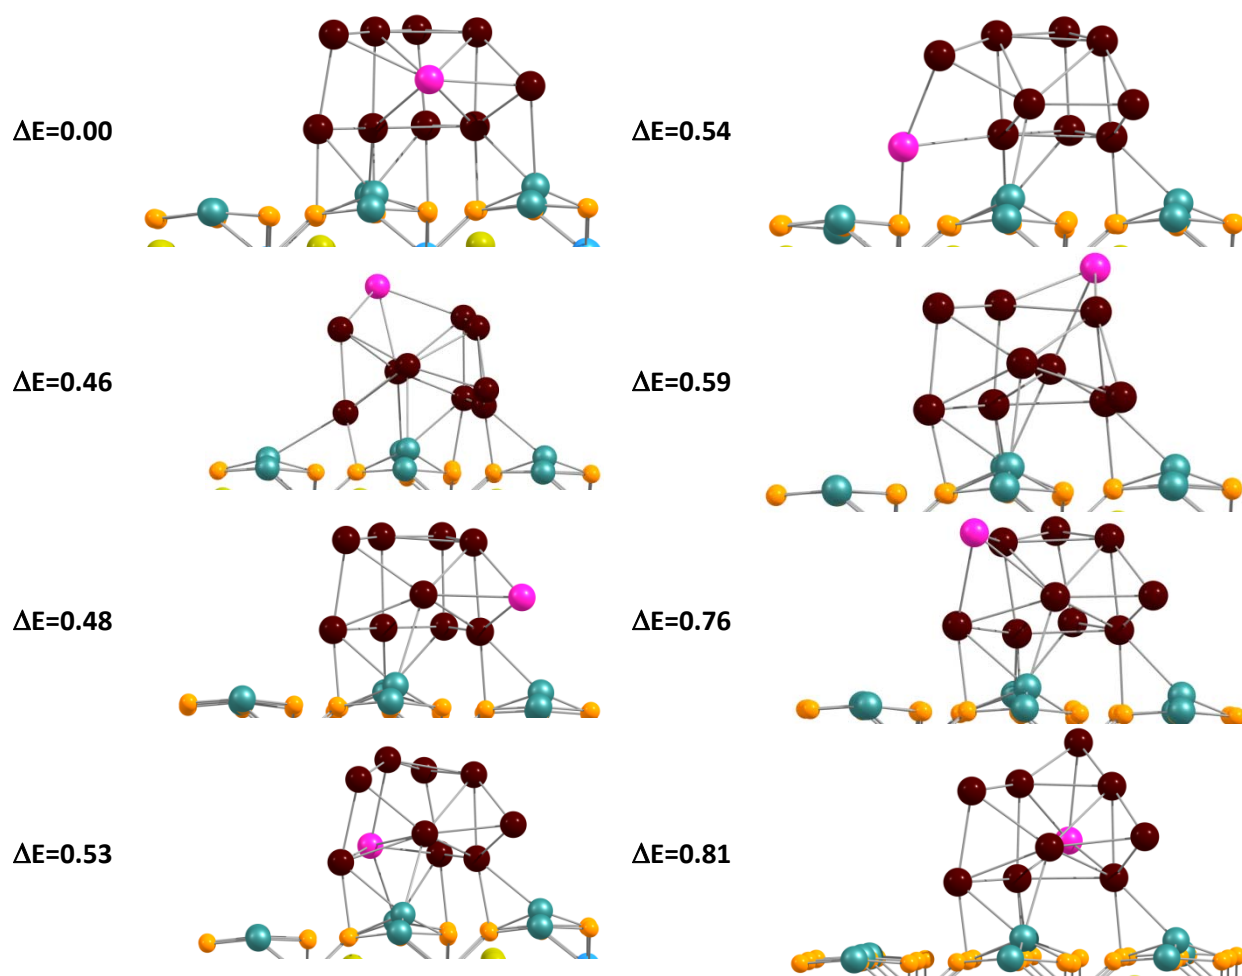

Figure-S4: Low lying isomer of  $\text{AgPt}_9@\text{Al}_2\text{O}_3$  cluster.  $\Delta E$  indicates relative stability.

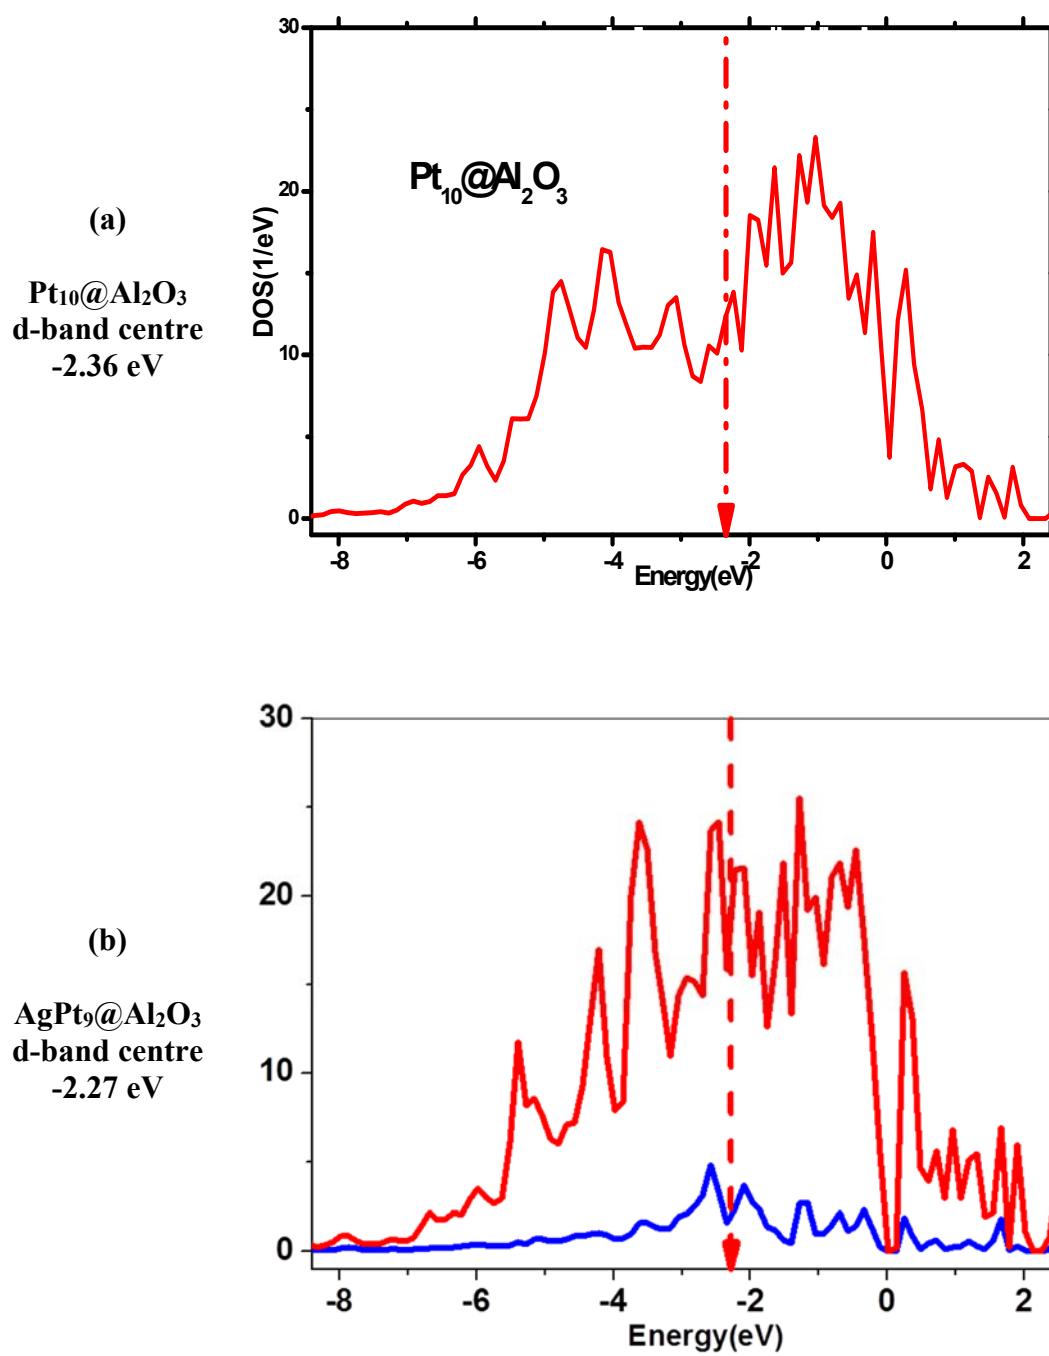

Figure-S5: Comparative DOS spectrum of (a)  $\text{Pt}_{10}@ \text{Al}_2\text{O}_3$  and (b)  $\text{AgPt}_9@ \text{Al}_2\text{O}_3$ .

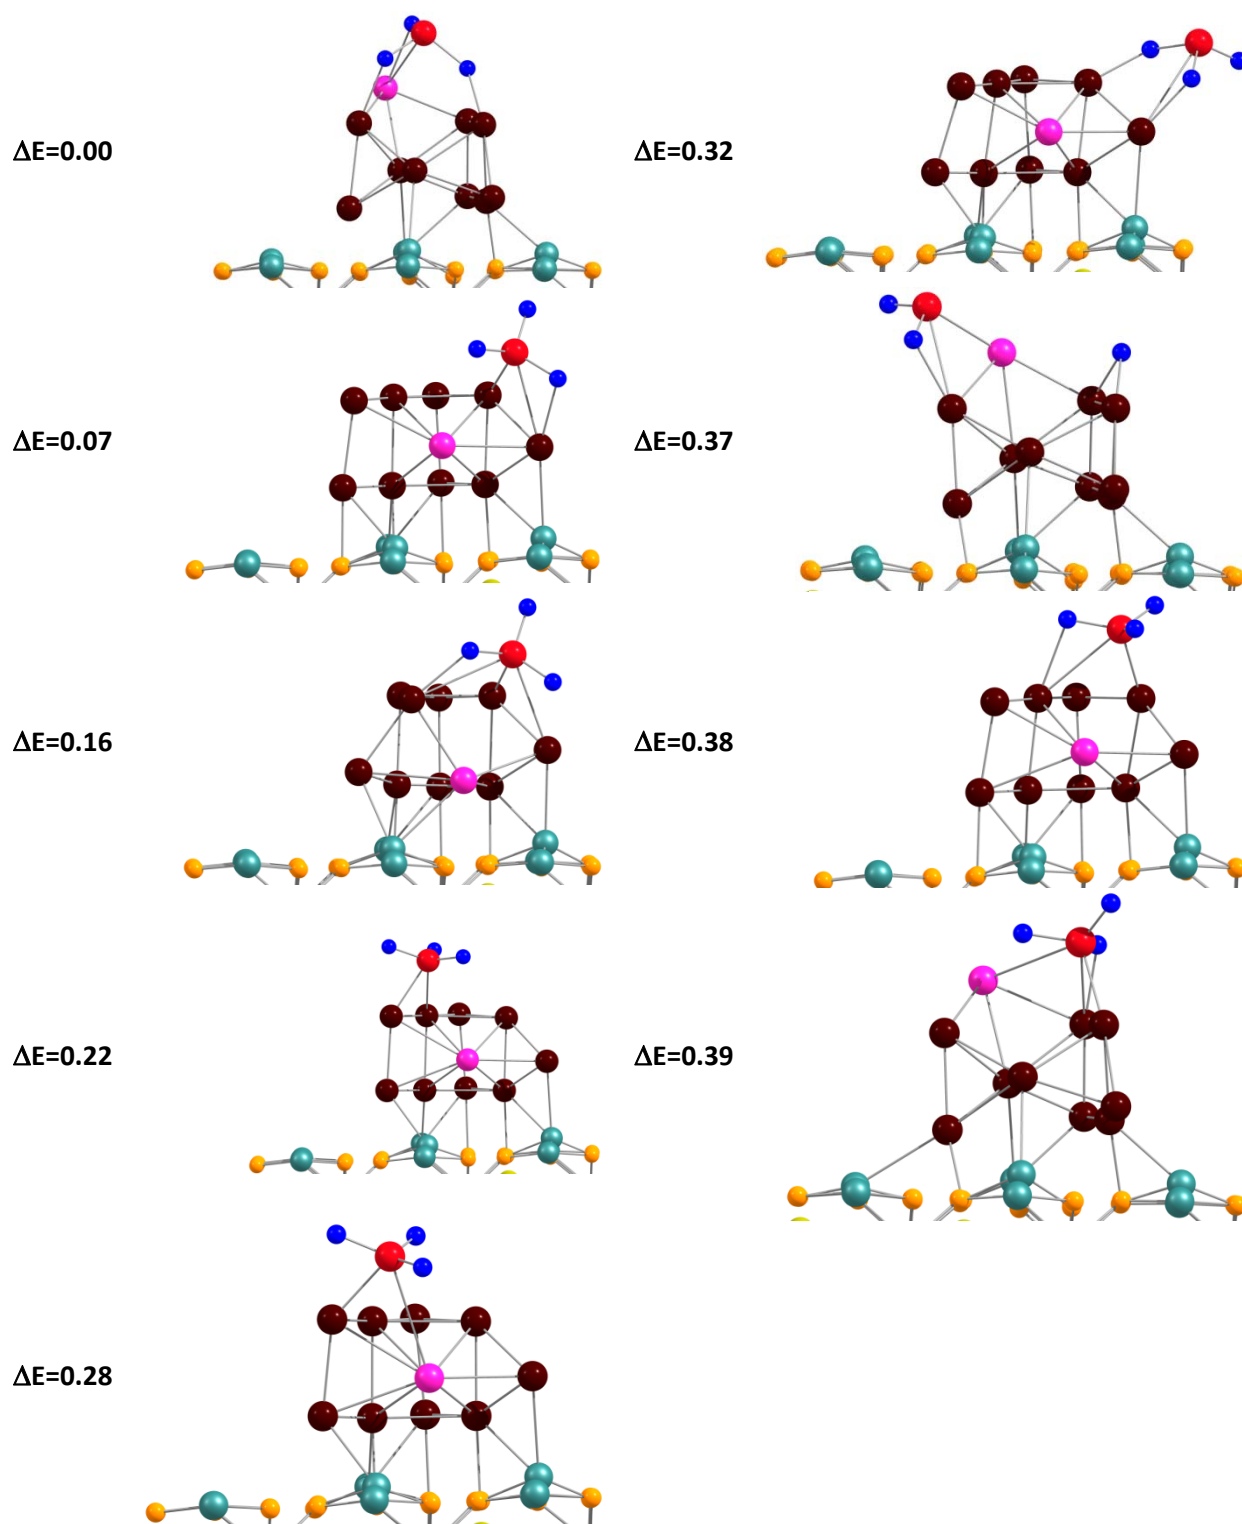

Figure-S6: Low lying isomer of  $\text{SO}_3\text{-(AgPt}_9\text{@Al}_2\text{O}_3\text{)}$  complex.  $\Delta E$  indicates relative stability.

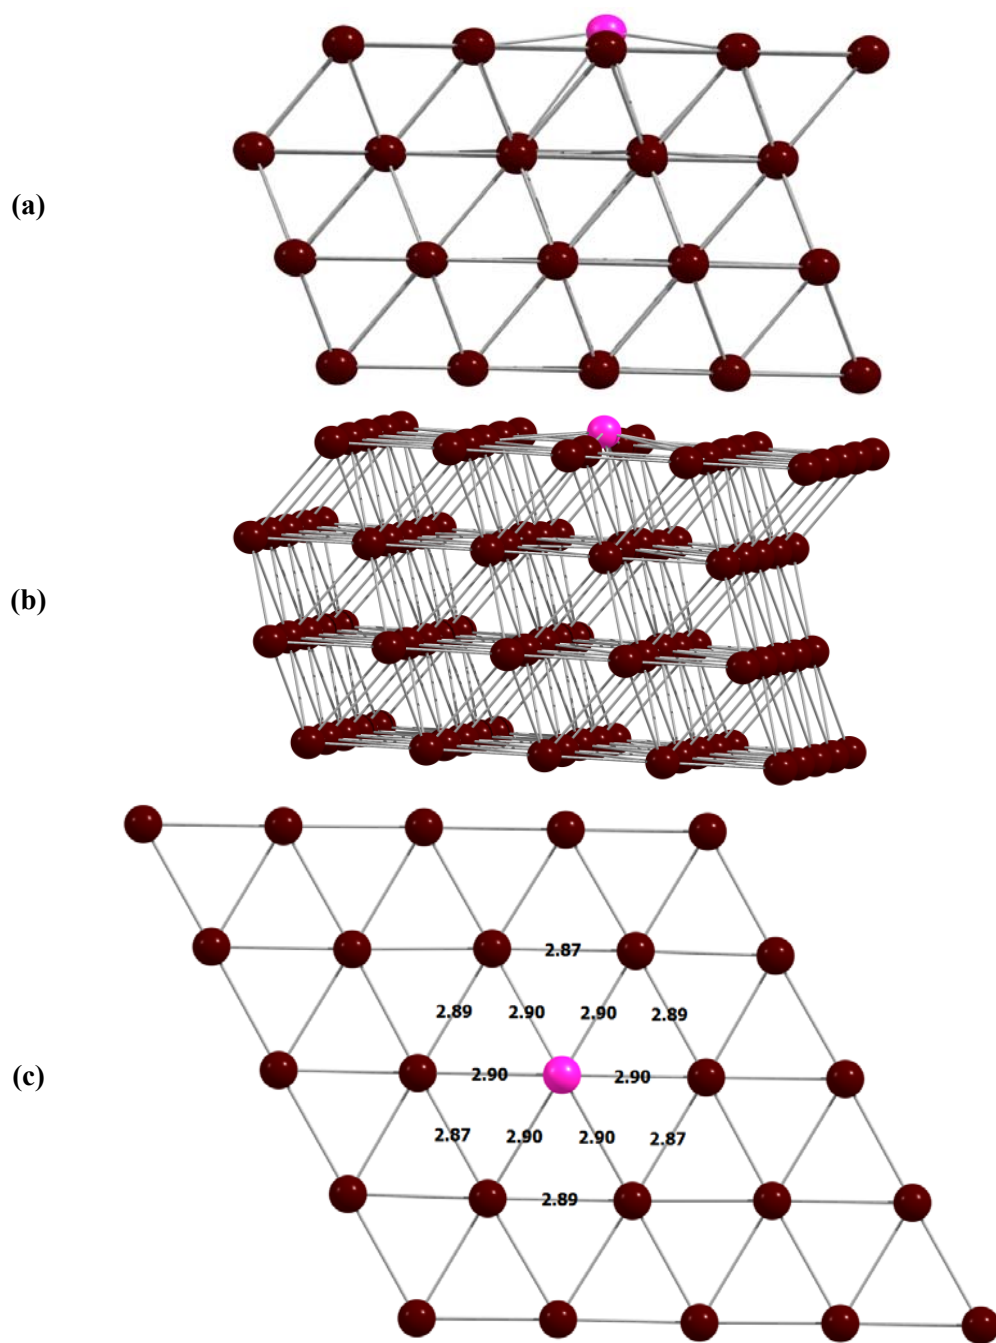

Figure-S7: Single Ag atom substituted Pt(111) surface. The substitution at 2<sup>nd</sup> and 3<sup>rd</sup> layer is found to be 0.25 and 0.26 eV higher in energy.

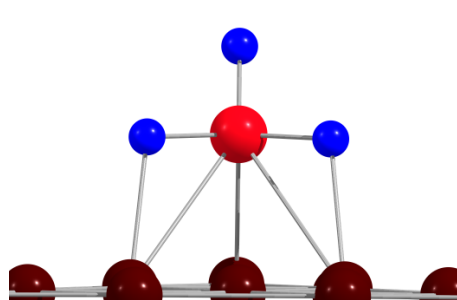

$\Delta E=0.00$

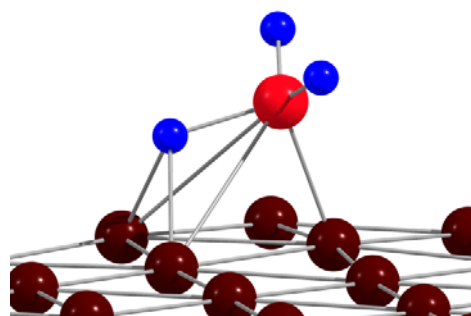

$\Delta E=0.36$

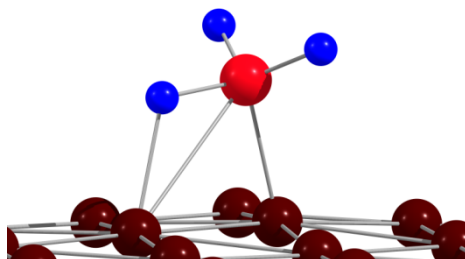

$\Delta E=0.26$

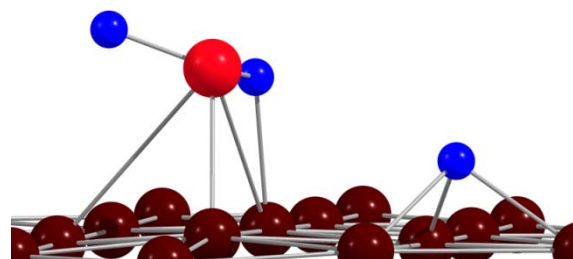

$\Delta E=1.01$

### Pt(111) Surface

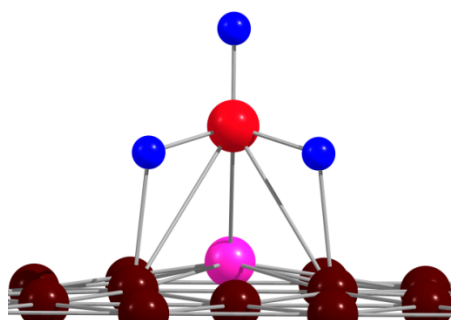

$\Delta E=0.00$

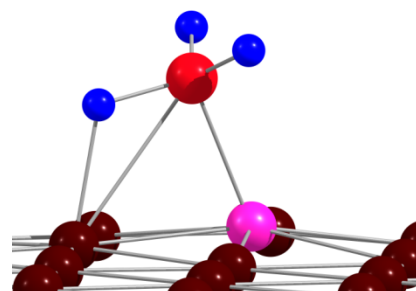

$\Delta E=0.45$

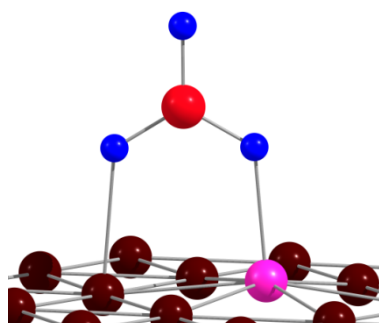

$\Delta E=0.38$

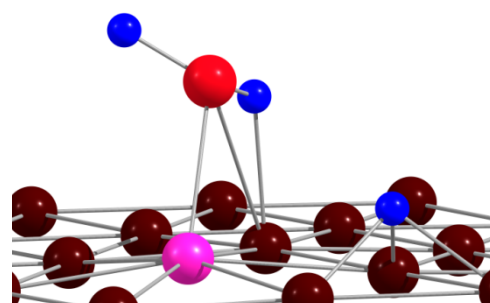

$\Delta E=0.52$

### Ag-doped Pt(111) Surface

Figure-S8: Low lying isomer of  $\text{SO}_3$  on Pt(111) and  $\text{Ag}_1\text{Pt}(111)$  surface.  $\Delta E$  indicates relative stability.
